# Supplementary material for: Polygenic autoimmune disease risk alleles impacting B cell tolerance act in concert across shared molecular networks in mouse and in humans
Source: Front Immunol. 2022 Aug 24;13:953439. doi: 10.3389/fimmu.2022.953439 (PMC9450536; doi:10.3389/fimmu.2022.953439)
Supplement: Supplementary Table 1A — Monogenic Routes to Human Lupus – Gene(s) refers to the gene or genes that when mutated has been reported to lead to lupus or a lupus-like phenotype. Gene name refers to the HGNC (HUGO Gene Nomenclature Committee [https://www.genenames.org/]) official full name for that gene. Locus refers to chromosome and cytoband for that gene. Protein refers to the common protein name for a particular gene. Inheritance indicates the mode of inheritance (if reported) according to the abbreviations at the end of the table. Pathway refers to the reported pathway disrupted by the mutation. Phenotype refers to the phenotype observed, whether part of another defined genetic syndrome, such as Noonan syndrome or whether part of bona fide SLE or another lupus-like phenotype. Reference refers to numbered reference in the bibliography of this publication. PMID or link refers to the pubmed.gov identifier (PMID) for the publication or publications establishing the gene as a monogenic route to lupus or a review of several publications. [file Table_1.xlsx]

## Sheet: A Monogenic Human SLE
Gene(s)	Gene Name	Locus	Protein	Inheritance	Pathway	Phenotype	PMID or link
ACP5	Acid phosphatase 5,tartrate resistant	19p13.2	TRAP	AR	Nucleic acid sensing and degradation Type I IFN	SPENCD, SLE	21217755
ADA2	adenosine deaminase 2	22q11.1	ADA2	AD	type I interferon	Deficiency in ADA2	23001123, 25604658
ADAR1	Adenosine deaminase, RNA specific	1q21.3	Adenosine deaminase, RNA specific	AR/AD	Type I IFN	AGS, SLE	19790049
C1QA	Complement C1q A chain	1p36.12	C1q	AR	Complement	Complement deficiencies, SLE	19790049
C1QB	Complement C1q B chain	1p36.12	C1q	AR	Complement	Complement deficiencies, SLE	19790049
C1QC	Complement C1q C chain	1p36.12	C1q	AR	Complement	Complement deficiencies, SLE	28544690
C1R	Complement component C1r	12p13.31	C1r	AR	Complement	Complement deficiencies, SLE	20191570
C1S	Complement C1s	12p13.31	C1s	AR	Complement	Complement deficiencies, SLE	22863655
C2	Complement C2	6p21.33	C2	AR	Complement	Complement deficiencies, SLE	11367523
C4A/C4B	Complement C4A	6p21.33	C4	AR	Complement	Complement deficiencies, SLE	7105499, 893674
C8A/C8B/C8G	Complement C8	1p32.2, 9q34.3	C8	AR	Complement	Complement deficiencies, SLE	34596815
CYBB	Cytochrome b-245 beta chain	Xp21.1-p11.4	NADPH oxidase 2	X-linked	Phagocytosis, ROS generation	Chronic granulomatous disease	11479590
DDX58	DExD/H-box helicase 58	9p21.1	RIG-I	AD	Nucleic acid sensing and degradation, type I Interferon	Singleton-Merton Syndrome 2	22019780
DNASE1	Deoxyribonuclease 1	16p13.3	DNASE1	AD	Nucleic acid sensing and degradation	SLE	28668589
DNASE1L3	Deoxyribonuclease 1 like 3	3p14.3	DNASE1L3	AR	Nucleic acid sensing and degradation	SLE	8787672
DNASE2	deoxyribonuclease 2, lysosomal	19p13.13	DNASE II	AR	Nucleic acid sensing and degradation, type I Interferon	Defective erythropoiesis	24686847
FAS	Fas cell surface death receptor	10q23.31	FAS	AD	Apoptosis	ALPS	29705243, 27939403
FASLG	Fas ligand	1q24.3	FASL	AD	Apoptosis	ALPS	27887993
IFIH1	Interferon induced with helicase C domain 1	2q24.2	IFIH1	AD	Type I IFN	AGS, SLE	20810036, 22488759, 23786871
IKZF1	IKAROS family zinc finger 1	7p12.2	Ikaros	AD	B cell development and tolerance	SLE, immunodeficiency	14760529
ISG15	ISG15 ubiquitin-like modifier	1p36.33	ISG15	AR	Type I IFN	AGS	34889940
KRAS	KRAS proto-oncogene, GTPase	12p12.1	KRAS	AD	RAS-MAPK signaling	Noonan syndrome	32506314, 31362757, 24641667, 22266152, 25989067, 30504085
MAN2B1	Mannosidase alpha, class 2B member 1	19p13.13	Lysosomal Alpha-mannosidase	AR	Metabolism of carbohydrates	Alpha-mannosidosis	19937054, 24330273, 9196362, 17570078, 19308961, 22726576
OTUD1	OTU deubiquitinase 1	10p12.2	OTUD1	AD	Type I IFN	SLE, RA	23666743
P2RY8	P2Y receptor family member 8	Xp22.33 Yp11.2	P2RY8	AD	Germinal Center B cell migration	SLE, APS	29115062
PEPD	Peptidase D	19q13.11	Prolidase	AR	Aminopeptidase activity	Prolidase deficiency	29115062
PRKCD	Protein kinase C delta	3p21.1	PRKCD	AR	Self-tolerance	SLE	29115062
PSMA3	Proteasome subunit alpha 3	14q23.1	PSMA3	AD	Proteasome	CANDLE	22488759, 23786871
PSMB4	Proteasome subunit beta 4	1q21.3	PSMB4	AD	Proteasome	CANDLE	25312763
PSMB8	Proteasome subunit beta 8	6p21.32	PSMB8	AD	Proteasome	CANDLE	https://doi.org/10.1101/2020.04.27.046102
PTEN	Phosphatase and tensin homolog	10q23.31	PTEN	AD	PI3K signaling	SLE, PTEN hamartoma syndrome, Cowden Syndrome	26903602
PTPN11	Protein tyrosine phosphatase, non-receptor type 11	12q24.13	PTPN11	AD	RAS-MAPK signaling	Noonan syndrome	26903602
RAF1	Raf-1 proto-oncogene, serine/threonine kinase	3p25.2	RAF	AD	RAS-MAPK signaling	Noonan Syndrome	26903602
RAG1	Recombination activating gene 1	11p12	RAG1	AD	Lymphocyte Development	"Leaky" SCID	21204240, 20571986
RAG2	Recombination activating gene 2	11p12	RAG2	AR/AD	Self-tolerance	SLE	https://acrabstracts.org/abstract/does-loss-of-function-variants-in-sat1-cause-x-linked-pediatric-lupus/
RELA	RELA proto-oncogene, NF-kB subunit	11q13.1	RELA, NF-kb p65	AD	NF-kB, type I IFN	RELA haploinsufficiency, SLE	22488759, 23786871
RNASEH2A	Ribonuclease H2 subunit A	19p13.13	RNASEH2 Complex	AR	Nucleic acid sensing and degradation	AGS	28087478, 8892019, 15051284, 9504787, 11548196,
RNASEH2B	Ribonuclease H2 subunit B	13q14.3	RNASEH2 Complex	AR	Nucleic acid sensing and degradation	AGS	33087723, 32499645
RNASEH2C	Ribonuclease H2 subunit C	11q13.1	RNASEH2 Complex	AR	Nucleic acid sensing and degradation	AGS	25036569
SAMHD1	SAM and HD domain containing deoxynucleoside triphosphate triphosphohydrolase 1	20q11.23	SAMHD1	AR	Type I IFN	AGS, SLE, FCL	25029335
SAT1	spermidine/spermine N1-acetyltransferase 1	Xp22.11	SAT1	XLR	Polyamine metabolism, Type I IFN effector	SLE	31625129, 34559261, 34030699, 33679772, 29317407
SHOC2	SHOC2 leucine rich repeat scaffold protein	10q25.2	SHOC2	AD	RAS-MAPK signaling	Noonan syndrome	25731743
SLC7A7	Solute carrier family 7 member 7	14q11.2	SLC7A7	AR	Amino acid transporter	Lysinuric protein intolerance	28830446, 26922074
SOCS1	Suppressor of Cytokine Signaling 1	16p13.13	SOCS1	AD	Cytokine Signaling	SOCS1 Haploinsufficiency	25620203
SOS1	SOS Ras/Rac guanine nucleotide exchange factor 1	2p22.1	SOS1	AD	RAS-MAPK signaling	Noonan Syndrome	29259162, 11375492
TMEM173	transmembrane protein 173	5q31.2	STING	AD	type I interferon	SAVI	30100102
TNFAIP3	Tumor Necrosis Factor Alpha Induced Protein 3	6q23.3	A20	AD	NF-KB & Ubiquitination	HA20	22488759, 23786871
TNFRSF13B	Tumor necrosis factor receptor superfamily member 13B	17p11.2	TACI	AD	B cell survival and proliferation	Smith-Magenis-Sydrome, Haploisufficiency for TACI	24472623, 26457731, 30800289
TNFSF13B	TNF superfamily member 13b	13q33.3	BAFF, BLYS	Rare Variant	B cell survival and proliferation	RA, SLE	22488759, 23786871
TREX1	three prime repair exonuclease 1	3p21.31	TREX1	AD	Nucleic acid sensing and degradation	AGS, FCL	29859654, 29844438
USP18	ubiquitin specific peptidase 18	22q11.21	ISG15 protease	AR	Type I IFN	Pseudo-TORCH syndrome	27325888
AD, autosomal dominant;
AGS, Aicardi-Goutieres Syndrome;
ALPS, autoimmune lymphoproliferative syndrome;
AR, autosomal recessive;
CANDLE, chronic atypical neutrophilic dermatosis with lipodystrophy and elevated temperature;
FCL, familial chilblain lupus;
HA20, haploinsufficiency of A20;
RA, Rheumatoid Arthritis;
SAVI, STING-associated vasculopathy with onset in infancy;
SLE, systemic lupus erythematosus;
SPENCD, Spondyloenchondrodysplasia.

## Sheet: B Monogenic Human T1D
Gene(s)	Gene Name	Locus	Protein	Inheritance	Pathway	Phenotype	PMID
AIRE	autoimmune regulator	21q22.3	AIRE	AD	Thymic T cell development	APS1; AUTOIMMUNE POLYENDOCRINE SYNDROME, TYPE I, WITH OR WITHOUT REVERSIBLE METAPHYSEAL DYSPLASIA (OMIM: 240300)	27474216
FOXP3	forkhead box p3	Xp11.23	FOXP3	X-linked	T regulatory cell development	IPEX; IMMUNODYSREGULATION, POLYENDOCRINOPATHY, AND ENTEROPATHY, X-LINKED (OMIM: 304790)	27474216, 33761697, 29193502
IL2RA	interleukin 2 receptor subunit alpha	10p15.1	CD25	AR	Cytokine Signaling	IMD41; Immunodeficiency with autoimmunity and lymphocyte proliferation; (OMIM: 606367) Type 1 diabetes Mellitus 10; (OMIM: 601942)	27474216
ITCH	itchy E3 ubiquitin ligase	20q11.22	ITCH	AR	Multiple	ADMFD; AUTOIMMUNE DISEASE, MULTISYSTEM, WITH FACIAL DYSMORPHISM; (OMIM: 613385)	27474216
LRBA	LPS responsive beige-like anchor protein	4q31.3	LRBA	AR	Lymphocyte development	CVID8; IMMUNODEFICIENCY, COMMON VARIABLE, 8, WITH AUTOIMMUNITY (OMIM: 614700)	27474216, 33845048, 28473463
SIRT1	sirtuin 1	2q32.2	Sirtuin 1	AD	Thymic T cell development		23473037, 26006015
STAT1	signal transducer and activator of transcription 1	10q21.3	STAT1	Multiple	Cytokine Signaling	Immunodeficiency 31C; (OMIM: 614162); (IMD31A; 614892); (IMD31B; 613796)	27474216
STAT3	signal transducer and activator of transcription 3	17q21.2	STAT3	AD	Cytokine Signaling	ADMIO1; infantile-onset multisystem autoimmune disease-1 (OMIM 615952)	34115115, 25038750
