# Supplementary material for: Polygenic autoimmune disease risk alleles impacting B cell tolerance act in concert across shared molecular networks in mouse and in humans
Source: Front Immunol. 2022 Aug 24;13:953439. doi: 10.3389/fimmu.2022.953439 (PMC9450536; doi:10.3389/fimmu.2022.953439)
Supplement: Supplementary Table 3 — Genes involved in lupus, type 1 diabetes, peripheral and central B cell tolerance from mouse models – Murine locus – genetic locus, gene name or common protein name of the gene. Gene location – murine chromosome and cytoband of the gene in question. GL Murine – gene location on chromosome in centimorgans. Human orthologue – where identifiable, the human orthlogue to the murine gene in question. Gene location (human) chromosome and cytoband of that human gene. Gene name – HGNC gene name of the gene where applicable. (HGNC = HUGO Gene Nomenclature Committee [https://www.genenames.org/]). Protein – abbreviation or common name for the protein encoded by the gene. Pathway – pathway implicated in the function of this gene in the corresponding class. Model – murine model where gene was implicated. Phenotype – phenotype resulting from gene alteration. Class – murine disease/model state implicated: either lupus, T1D, peripheral tolerance, central tolerance or some combination. PMID – PubMed ID of the publications supporting the link of the gene with a particular class. [file Table_3.xlsx]

## Sheet: Murine_Lupus_T1D_BcellToler (2)
Murine Locus	Gene Location (Murine)	GL Murine (centimorgans)	Human orthologue	Gene Location (Human)	Gene Name	Protein	Pathway	Model	Phenotype	Class	PMID
Acadl	1 C3	1 33.64cM	Acadl	2q34	acyl-CoA dehydrogenase long chain	Acadl	Responsible for fatty acid metabolism, decreased ACADL = increased fatty acid accumulation = inhibited NF-kB pathway in Macrophages	NOD or Idd3/5	inhibited NF-kB	type 1 diabetes	19111166
Aicda	6 F1		AICDA	12p13.31	activation induced cytidine deaminase	Aicda	central tolerance			central tolerance	29321370
Aire	10 C1	10 39.72 cM	AIRE	21q22.3	autoimmune regulator	Aire	negative selection of autoreactive T Cells		autoreactive t cells	type 1 diabetes	19111166
Apcs	1 H3	1 80.33cM	APCS	1q23.2	amyloid P component, serum	APCS	ANA development	SAP(-/-)	autoantibody production	lupus	15147569
Baff = Tnfsf13	11 B3		TNFSF13	17p13.1	TNF superfamily member 13	Tnfsf13	mediates survival of immature and self-reactive B cells	sHEL; anti-HEL BCR double transgenic		peripheral tolerance, lupus	15189742, 11085747
Bcl2	1 E2.1	1 49.76cM	BCL2	18q21.33	BCL2 apoptosis regulator	BCL2	cytokines induces pancreatic Beta cell apoptosis		pro-inflammatory cytokine production	lupus	21364654, 27159593, 25418983, 17162369
Bhlhe40	6	6 E2	BHLHE40	3p26.1	basic helix-loop-helix family member e40	STRA13	ineffective elimination of T and B cells	Stra13-/-	Increased activated T and B cells, autoantibodies.	lupus	11668339
Bim (Bcl2l11)	2 F1		BCL2L11	2q13	BCL2 like 11	Bcl2l11	B cell anergy			peripheral tolerance, lupus	16520387, 10576740, 34512628
BLK	14 D1	14 33.25 cM	BLK	8p23.1	BLK proto-oncogene	Blk	dysregulation of proinflammatory cytokine network	B6.lpr/lpr mice	accelerated autoimmune pathology	peripheral tolerance, lupus	24637841
Blk	14 D1	14 33.25 cM	BLK	8p23.1	BLK proto-oncogene, Src family tyrosine kinase	BLK	dysregulation of proinflammatory cytokine network	B6.lpr/lpr mice	accelerated autoimmune pathology	peripheral tolerance, lupus	21894171
Bob1 (mir146a)	11 A5	11	POU2AF1	11q23.1	POU class 2 homeobox associating factor 1	Bob1	B cell anergy		anti-dsDNA	peripheral tolerance, lupus	24719463
Bxs1	1 (40–90 Mb)						Glomerulonephritis	B10.Yaa.Bxs1/4	Lupus		15383556
c1qa	4 D3	4 69.05	C1QA	1p36.12	complement C1q	C1Q	C1q deficiency causes SLE or do C1q autoantibodies exacerbate disease?	C1qa KO	lupus	lupus	9777411, 10072632
c1qb	4 D3	4 69.05	C1QB	1p36.12	complement C1q	C1Q	C1q deficiency causes SLE or do C1q autoantibodies exacerbate disease?		lupus	lupus	9777411, 10072632
c1qc	4 D3	4 69.05	C1QC	1p36.12	complement C1q	C1Q	C1q deficiency causes SLE or do C1q autoantibodies exacerbate disease?		lupus	lupus	9777411, 10072632
Cblb	16 B5		CBLB	3q13.11	Cbl proto-oncogene B	CBLB	spontaneous auto-ab production, IL2 hyperproduction and lymphocyte proliferation	cbl-b(-/-)	lymphocyte activation, autoantibody production	lupus	10646608, 11086108
Cd101	3 F2.2	3 43.90	Cd101	1p13.1	CD101 molecule	Immunoglobulin superfamily member 2	negative-costim function and t reg promotion. Confrimed as Idd10	NOD	type 1 diaetes	T1D	31199784
Cd101	3 F2.2	3 43.90	Cd101	1p13.1	CD101 molecule	Immunoglobulin superfamily member 2	negative-costim function and t reg promotion. Confrimed as Idd10	NOD	type 1 diaetes	T1D	31199784
Cd19	7 F3	7 69.01cM	CD19	16p11.2	CD19 molecule	CD19	CD19 deficient B cells lack T cell activation	CD19-/-	T cell activation	lupus	7543183, 7515149
Cd22	7 B1	7 19.26cM	CD22	19q13.12	CD22 molecule	CD22	SHIP and MAP kinase pathway	CD22 KO	inhibits BCR signalling, when knocked out, BCR signaling is elevated	lupus	8864124, 30323814, 9586639
CD226	18 E4		CD226	18q22.2	CD226 molecule	CD226	modulates thymic T cell selection, CD8+ T cell activation			T1D	33013915
CD229 = Ly9	1 H3	1 79.54	LY9	1q23.3	Lymphocyte antigen 9	Ly-9	ANA development	Ly9-/-	Lupus	lupus	15589166, 23914190
Cd38	5 B3	5 23.85	Cd38	4p15.32	CD38 molecule	Cd38	impaired B cell receptor stimulation, impaired Treg development	NOD.B6.129.P2-Cd38Tm1Lnd/Lt denoted as NOD.CD38−/−, NOD.SCID.CD38−/−)		type 1 diabetes	16585549
Cd40lg	X A6	X 31.21cM	CD40LG	Xq26.3	CD40 Ligand	CD40LG	over expressed on CD4 T cells in lupus patients	B6.129S2-Cd40lgtm1Imx/J aka CD40L KO	B cell activation, T cell activation	lupus	11751940, 19404646, 9379059
Cd48	1 H3	1 79.54	CD48	1q23.3	CD48 molecule	CD48 antigen	T cell activation. Bound and free upregulation in infection/inflammation	B6.129S4-Cd48tm1Rsr/EpaulJ	lupus, autoimmunity	lupus	26794910, 21278219
Cd48	1 H3	1 79.54cM	CD48	1q23.3	CD48 molecule (Slamf2)	CD48	anti-DNA auto-ab	B6.129CD48-/-	autoantibody production	lupus	21561736, 15905190, 11172029
CD70	17 D	17 29.69cM	CD70	19p13.3	CD70 molecule	CD70	co-stimulates with CD27, blocking co-stim pathway increases circ T cells	NOD/ShiLtDvs (Cd70−/−)	T cell activation	type 1 diabetes	32868408
Cd72	4 A5	4 23.04 cM	CD72	9p13.3	cluster of differentiation 72	CD72	inhibitory signaling	Fas(lpr)	lupus	lupus, peripheral tolerance	23616572
Cd72	4 A5	4 23.04 cM	CD72	9p13.3	cluster of differentiation 72	CD72	inhibitory signaling	NOD	type 1 diabetes	T1D	14563017
Cd84	1H3	1 79.54	CD84	1q23.3	CD84 molecule	CD84 antigen	stabilize B-T cell interactions and germinal center development, over expression prevents autoimmunity	B6.Sle1b, B6.Sle1b BAC 90	Lupus	lupus	21094032, 25801429
Cdkn1a	17 A3	17 15.12cM	CDKN1A	6p21.2	cyclin dependent kinase inhibitor 1A	CDKN1A	p21 cell cycle inhibitor	p21-/-	T cell proliferation	lupus	10655105, 19262578
cdkn2c	4 C7	4 51.32cM	cdkn2c	1p32.3	cyclin dependent kinase inhibitor 2C	cdkn2c	deficiency promotes B1a expansion		autoreactive b cells	lupus	21543644, 22896639
Cflar	1 C1.3	1 29.16cM	CFLAR	2q33.1	CASP8 and FADD like apoptosis regulator	CFLAR	Increased CFLAR expression and then FLIP expression inhibiting Fas death pathway in myeloid, T, and B cells in lupus patients	B6.129-Cflartm1Ywh/J	lymphocyte activation	lupus	19816511, 11318598
Coronin-1A	7 F3	7 69.25	CORO1A	16p11.2	coronin 1A	Coronin-1A	Coro1a mutation suppresses disease due to failure to localize to cell membrane	B6-Faslpr/Scr.B6-Coro1awt	Lupus	lupus	18199416
Coronin-1A	7 F3	7 69.25cM	CORO1A	16p11.2	coronin 1A	Coronin-1A	Coro1a mutation suppresses disease due to failure to localize to cell membrane	B6-Faslpr/Scr.B6-Coro1awt	lymphocyte activation	lupus	18199416
CRP	1 H3	1 94.2	CRP	1q23.2	C-reactive protein	CRP	activates classical complement pathway, associated with clearance of apoptotic cells = protective again autoimmunity	none	Lupus	lupus	4009117, 12794828
Cs1 = Slamf7	1 H3	1 79.54	Slamf7	1q23.3	Slam family member 7	SLAMF7	down regulated in B6.Sle1b mice	B6.Sle1b	Lupus	lupus	15589166
Csf2	11B1.3	11 32.13cM	CSF2	5q31.1	colony stimulating factor 2	CSF2	reduced apoptotic material clearance	GM-CSF-/-	anti-dsDNA and anti-C1q reactivity	lupus	12732663, 8171324
csf3r	4 D2.2	4 59.77cM	csf3r	1p34.3	colony stimulating factor 3 receptor	csf3r	type 1 ifn pathway	B6.Sle2c2	anti-dsDNA IgG, T cell tolerance in impaired CSFR signaling	lupus	https://www.jimmunol.org/content/202/1_Supplement/50.11
CSK	9 B	9 31.18 cM	CSK	15q24.1	C-terminal Src Kinase	CSK	B cell anergy, self-tolerance	BCR crosslinking	murine splenocyte	peripheral tolerance	34675079
ctla4	1 C2	1 30.58cM	Ctla4	2q33.2	cytotoxic T-lymphocyte associated protein 4	Ctla4	Treg anergry	NOD	Treg suppression and anergy	type 1 diabetes	19111166
ctla4	1 C2	1 30.58cM	CTLA4	2q33.2	cytotoxic T-lymphocyte associated protein 4	CTLA4	T cell activation, T cell proliferation	CTLA-4 -/-	peripheral t cell activation	lupus	7584144
Cxcr4	1 E4	1 56.43 cM	CXCR4	2q22.1	C-X-C motif chemokine receptor 4	Cxcr4	central tolerance	NSG (NOD.Scid.Gamma deficient) huMice	Central tolerance	central tolerance	33850015
Cybb	X	X A1.1	CYBB	Xp21.1-p11.4	cytochrome b-245 beta chain	CYBB	NOX2 subunit, see NCF2			lupus	23100627
Def6	17	17 A3.3	DEF6	6p21.31	DEF6 guanine nucleotide exchange factor	DEF6	Def6 promotes TCR induced Ca2+ release	Def6-/-	Def6-/- mice are resistant to T helper 1 (Th1) and Th2 cell-mediated inflammation	lupus	16470246
DNASE1	16 A1	16 1.7	DNASE1	16p13.3	deoxyribonuclease 1	Dnase1	protection against an anti-DNA autoimmune response	Dnase1-/-	autoimmunity	lupus	15015938
Dusp10	1 H5	1 88.20	Dusp10	1q41	dual specificity phosphatase 10	Dusp10	MAP kinase inactivation, p38 dephosphorylation	NOD	type 1 diabetes	T1D	34782469
Dusp10	1 H5	1 88.20	Dusp10	1q41	dual specificity phosphatase 10	Dusp10	MAP kinase inactivation, p38 dephosphorylation	NOD	type 1 diabetes	T1D	34782469
E2F2	4	4 D3	E2F2	1p36.12	E2F transcription factor 2	E2F2	E2F2 deficienty increases T proliferation and ANA	E2F2(-/-)	ANA	lupus	11754817
Ep300	15	15 E1	EP300	22q13.2	E1A binding protein p300	EP300	coregulates transcription with NF-kB and Bcl-6	p300AS-neo	aberrant mature B cells in p300 KO mice	lupus	17513743
Esrrg	1	1 H5-H6	Esrrg	1q41	estrogen related receptor gamma	Esrrg	CD4 T cell function regulated through mitochondrial metabolism	B6.Sle1c2	T cell activation	lupus	22711888
Ets1	9 A4	9 17.97 cM	ETS1	11q24.3	ETS proto-oncogene 1, transcription factor	ets-1	prevents plasma cell differentiation			peripheral tolerance	26209625, 24929000
Fcgr2b	1H3	1 78.02	FCGR2B	1q23.3	Fc gamma receptor Ilb	CD32	regulation of antibody production	FcgyRIIb-/-	autoimmune disorders including lupus	lupus	20385827, 15592473
Fli1	9 A4	9 17.74cM	FLI1	11q24.3	Fli-1 proto-oncogene, ETS transcription factor	FLI1	reduced FLI1 decreases TCR activation and IL4 production	MRL/lpr Fli1-/-	T cell activation, pro-inflammatory cytokine production	lupus	8524263
Foxo1	3 C	3 23.19 cM	FOXO1	13q14.11	forkhead box O1	Foxo1	central tolerance		Receptor editing/central tolerance	central tolerance	18469817
Gadd45a	6	6 30.72 cM	GADD45A	1p31.3	growth arrest and DNA damage inducible alpha	Gadd45a	central tolerance		Receptor editing/central tolerance	central tolerance	18469817
Gadd45a	6	6 C1	GADD45A	1p31.3	growth arrest and DNA damage inducible alpha	GADD45A	Negative regulator of T cell proliferation	Gadd45a-/-	High titers of anti-dsDNA, anti-ssDNA and anti-histone autoabs	lupus	11970874, 20131288, 10508513
Galectin 9	11B5		LGALS9	17q11.2	galectin 9	gal-9	regulates B cell activation threshold		anti-dsDNA, spontaneous autoimmune nephritis	peripheral tolerance, lupus	34369876
Gpr132	12	12 F1	GPR132	14q32.33	G protein-coupled receptor 132	GPR132	TCR and BCR downstream transcription target	G2A-/-	anti-nuclear auto-ab, lowered T cell activation threshold	lupus	11371358
H2-Aa	17 B1	17 17.98cM	HLA-DQA1	6p21.32	major histocompatibility complex, class II, DQ alpha 1	HLA	antigen processing	NOD	antigen presentation	type 1 diabetes	19111166
HCPH	6 F2	6 59.17	PTPN6	12p13.31	protein tyrosine phosphatase non-receptor type 6	Ptpn6	Activation of auto-reactive clones,early thymic involution	mev/mev (C57B6J viable motheaten homozygous	"motheaten: phenotype = impaired hematopoiesis, severe immunodeficiency, systemic autoimmunity	lupus	8348149, 8324828
Icmt	4	4 E2	ICMT	1p36.31	isoprenylcysteine carboxyl methyltransferase	ICMT	no isoaspartyl modifications to self-proteins for presentation	PCMT-/-	Increased T cell proliferation, high titers of anti-DNA autoantibodies	lupus	12960305
IFI200 family	1 H3	1 80.76	MNDA	1q23.1	myeloid cell nuclear differentiation antigen	mnda				lupus
Ifi202	1 H3	1 80.76	AIM2	1q23.1	Absent in melanoma 2	ifi211	NF-xB activator, elevated IL-12, inhibits p53-mediated apoptosis	cell line only?		lupus	16670293, 18424712
Ifi203	1 H3	1 80.76	IFI16	1q23.1	interferon gamma inducible protein 16	IFI16	modulates P53 function	C57BL/6-Ifi203em1Smoc		lupus	14757431, 17911419
Ifna7	4	4 C4; 4 42.03 cM	IFNA17	9p21.3	interferon alpha 17	IFNA17	auto-antibody development	B6.Sle2	increased auto antibodies (ssDNA, histone, dsDNA, and thyroglobulin) and increased B1a cell numbers	lupus	16200585
Ifng	10	10 66.75 cM	IFNG	12q15	interferon gamma	IFNG	anti-dsDNA and anti-histone auto-ab	IFNg overexpression in suprabasal layers of the epidermis with involucrin promoter control	anti-dsDNA, IgG deposition in glomeruli	lupus	9348302
Ighm	12	12 62.1 cM	IGHM	14q32.33	immunoglobulin heavy constant mu	IGHM	serum IgM deficient	μs−/− Mice	Increased T cell resoponse, expanded B1a population, increased IgG autoantibodies	lupus	9707605, 10748243
Ikzf1	11 A1	11 8.02 cM	IKZF1	7p12.2	IKAROS family zinc finger 1	Ikzf1	controls B Cell anergy and TLR signaling	sHEL; anti-HEL BCR double transgenic	autoantibody production	peripheral tolerance	31591571
Il2	3 B	3 18.3cM	Il2	4q27	Interleukin-2	Il2	T and B cell proliferation	NOD	tolerance via Treg	type 1 diabetes	19111166
Il2	3	3 18.3 cM	IL2	4q27	interleukin 2	IL2	peripheral tolerance, peripheral maintenance of T reg cells	IL-2 -/-	Accumulation of activated T cells	lupus	1830926, 18723131
il27	7 F3		il27	16p12.1-p11.2	interleukin 27	il27	alters balance of Treg and Th1, enhances effector funciton of CD8 T cells	NOD.Il27−/−	T cell activation	type 1 diabetes	31801074
il27ra	8 C2		il27ra	19p13.12	Interleukin 27 receptor subunit alpha	il27ra	alters balance of Treg and Th1, enhances effector funciton of CD8 T cells	NOD.Il27ra−/−	T cell activation	type 1 diabetes	31801074
Il2ra	2	2 8.91 cM	IL2RA	10p15.1	interleukin 2 receptor subunit alpha	IL2RA	regulation of peripheral lymphoid compartment	IL-2Ra -/-	polyclonal T and B cell expansion	lupus	7584142
Il2rb	15	15 37.52 cM	IL2RB	22q12.3	interleukin 2 receptor subunit beta	IL2RB	T cell activation, B cell differentiation to plasma cells	IL-2Rb -/-	T cell activation, plasma cell differentiation, high serum IgG1 and IgE auto0-abs	lupus	7770771
inpp5d	1 D	1 44.44 cM	INPP5D	2q37.1	SHIP-1	SHIP II	B cell anergy			peripheral tolerance	26152931
Irf8	8 E1	8 70.05 cM	IRF8	16q24.1	interferon reguatory factor 8	IRF8	B cell anergy	sHEL; anti-HEL BCR double transgenic	autoantibody production	peripheral tolerance	24218455
Itgam	7 F3		ITGAM	16p11.2	integrin subunit alpha M	Itgam	autroreactive B cell tolerance	BCR crosslinking, autoimmune disease	anti-snRNP Ig Tg mice	peripheral tolerance	24264377
Junb	8	8 41.41 cM	JUNB	19p13.13	JunB proto-oncogene, AP-1 transcription factor subunit	JUNB	hyper IL-6 signaling, increased G-CSF release	JunBΔep (epidermal loss of JunB)	High IL-6 activates Stat3, Socs-1 and Socs-3	lupus	19918056, 18641637
Kallikrein	7 B3	7 28.74	KLK1	19q13.33	kallikrein 1	kallikrein-1	Supresses Type 1 Interferon response	B6.Sle3 congenic	Lupus nephritis, Sjogren's Syndrome	lupus	19262577, 25259810, 34305928
Kras	6	6 77.37 cM	KRAS	12p12.1	KRAS proto-oncogene, GTPase	KRAS	lymphocyte activation and proliferations	MRL/lpr +/- FTS (Ras inhibitor)	lymphocyte activation and proliferation, anti-dsDNA and anti-cardiolipin	lupus	11737078, 16257268
Lat	7	7 F3	LAT	16p11.2	linker for activation of T cells	LAT	T cell proliferative expansion, resistance to TCR-mediated cell death	LATY136Fm/m	impaired thymocyte selection, T cell proliferations	lupus	12065840, 12065839
Lmb1	D4Mit12		JAK1		Idd9, Jak1, and IL014	Jak1	Production of anti-dsDNA abs.		Interval on chromosome 4 contains locus associated with T1D (Idd9)		8661718
Lrdm1	chromosomes 7 and 12										1460423
Ly108 / Slamf6	1 H3	1 79.54	SLAMF6	1q23.2-q23.3	SLAM family member 6	SLAMF6	T cell co-stimulation, decreased IL-2 cytokine production	Slamf6-/-	lupus	lupus	27368806, 21422172
Ly9	1	1 79.54 cM	LY9	1q23.3	lymphocyte antigen 9	LY9	Inhibitory reeceptor	Ly9-/-	systemic autoimmunity, ANA, anti-dsDNA, anti-nucleosome Abs. Expansion of Tfh and GC Bcells	lupus	11172029, 16778059
Lyn	4 A1	4 2.05	LYN	8q12.1	Src family tyrosine kinase	Lyn	BCR crosslinking abolished, but elevated IgM and IgA in serum and auto-abs detected	Lyn-/-	Lupus	lupus	7585947, 7584145
Lyn	4 A1	4 2.05	LYN	8q12.1	Src family tyrosine kinase	Lyn	reduced BCR signaling threshold	BCR crosslinking	spontaneous autoimmune disease	peripheral tolerance, lupus	12902486
Lyn	4	4 2.05 cM	LYN	8q12.1	LYN proto-oncogene, Src family tyrosine kinase	LYN	BCR crosslinking abolished, but elevated IgM and IgA in serum and auto-abs detected	Lyn-/-	Lupus	lupus	7585947, 9586639
Man2a1	17	17 E1.1	MAN2A1	5q21.3	mannosidase alpha class 2A member 1	MAN2A1	altered N-glycan branching disrupts nonself discrimination by innate immune system	αM-II null	increased ANA	lupus	17681821, 9230311
Map3k1	13	13 63.36 cM	MAP3K1	5q11.2	mitogen-activated protein kinase kinase kinase 1	MAP3K1	DNA hypomethylation in T Cells		anti-dsDNA Abs	lupus	18383376
Marco	1 E2.3		Marco	2q14.2	macrophage receptor with collagenous structure	Marco	failure to clear apoptotic cells increases AN auto-ab	Marco-/-	autoantibody production	lupus	19201851
Marco	1	1 E2.3	MARCO	2q14.2	macrophage receptor with collagenous structure	MARCO	decreased clearance of apoptotic cells	Marco−/−	anti-dsDNA Abs	lupus	19201851
Mark2	19	19 5.32 cM	MARK2	11q13.1	microtubule affinity regulating kinase 2	MARK2	T cell activation, T cell proliferation	Emk-/-	T cell activation, T cell proliferation	lupus	11287624
Mecp2	X	X 37.63 cM	MECP2	Xq28	methyl-CpG binding protein 2	MECP2	transcriptional regulation of mthylation-senstive genes	MeCP2308/y or Mecp2-null	increased IFNg, TNFa, and IL-1B, decreased IL-10, FoxP3, and CX3CR!	lupus	34040112, 19333917, 19100952
Mertk	2	2 F1	MERTK	2q13	MER proto-oncogene, tyrosine kinase	MERTK	apoptotic cell clearance	MerTK-/- (also flox available)	increased ANA	lupus	11346799
Mfge8	7 D2	7 44.9cM	MFGE8	15q26.1	milk fat globule EGF and factor V/VIII domain	mfge8	membrane glycoprotein that promotes phagocytosis of apoptotic cells	MFG-E8-/-	autoantibody production	lupus	15155946, 31811237
mir-148a	6 B3		MIR148A	7p15.2	microRNA 148a	mir-148a	impaired B cell tolerance		central tolerance	central tolerance	26901150
Mta2	19	19 A	MTA2	11q12.3	metastasis associated 1 family member 2	MTA2	T cell hyperproliferation	Mta2-/-	T cell proliferation, increased IL-4 and IFNg	lupus	18353770
MyD88	9 F3	9 71.33	MYD88	3p22.2	MYD88 innate immune signal transduction	MyD88	central tolerance		Central tolerance	central tolerance	28199836
nasp	4 D1	4 53.24cM	nasp	1p34.1	nuclear autoantigenic sperm protein	nasp	Decreased histone binding	ΔsNASP.lpr	effector CD4 expansion, anti-dSDNA IgG	lupus	31001259
Ncf1	5 G2	5 74.47cM	Ncf1	7q11.23	neutrophil cytosolic factor 1	Ncf1	decreased TNFa, IL1B, IL12, and p70, but increased IL23 and Th17 increases	NOD.Ncf1m1J	pro-inflammatory cytokine production	type 1 diabetes	20881184
Nfe2l2	2	2 44.75 cM	NFE2L2	2q31.2	NFE2 like bZIP transcription factor 2	NFE2L2	antioxidant gene deficiencies	nrf2-/-	anti-dsDNA and anti-smith Abs	lupus	15173550, 11576348
Nr4a1	15 F1		NR4A1	12q13.13	nuclear receptor subfamily 4 group A member 1	Nur77	repress BATF and MYC in B cells when no co-stimulation	Nr4a1−/− mice	B cell anergy	peripheral tolerance	32868928
Nr4a3	4 B1		NR4A3	9q31.1	nuclear receptor subfamily 4 group A member 3	Nr4a3 (Tocky)	repress BATF and MYC in B cells when no co-stimulation	Nr4a3−/−	B cell anergy	peripheral tolerance	32868928
P2rx7	5	5 F	P2RX7	12q24.31	purinergic receptor P2X 7	P2RX7	aponecrosis which is proinflammatory, secretion of IL-1B, CD62L shedding	NZB or NZW or (NZBxNZW)F1	increased apoptotic debris and ATP	lupus	15899033
Pbx1	1 H2.3	1 75.95cM	Pbx1	1q23.2	PBX Homeobox 1	Pbx1	increased CD44 expression		T cell activation	lupus	28257976
PDCD1	1 D		PDCD1	2q37.3	programmed cell death 1	PD-1	NF-kB and/or STAT1 activation, AHR regulation for immune tolerance	NOD-Pdcd1-/-	If nod background T1D, but different loci from usual NOD, if C57/B6 back ground, lupus	lupus	10485649, 30396745
Pecam1	11	11 E1	PECAM1	17q23.3	platelet and endothelial cell adhesion molecule 1	PECAM1	hyperresponsive B cells, autoantibodies, ANA	PECAM-1(-/-)	hyperresponsive B cells, autoantibodies, ANA	lupus	12070026
Pik3ca	3 A3	3 15.7 cM	PIK3CA	3q26.32	phosphatidylinositol-4,5-bisphosphate 3-kinase catalytic subunit alpha	p110	central tolerance	3–83Igi,H-2b Autoreactivity	autoantibody production	central tolerance	30948496
Ppard	17	17 14.64 cM	PPARD	6p21.31	peroxisome proliferator activated receptor delta	PPARD	impaired apoptotic cell clearance	Ppard(-/-)	autoantibody production	lupus	19838202
Pparg	6	6 53.41 cM	PPARG	3p25.2	peroxisome proliferator activated receptor gamma	PPARG	phagocytosis deficiency	Pparg(C/-)	phagocytosis needed for maintenance of self-tolerance	lupus	27221351, 21135166, 11733562
PTEN	19 C1	19 28.14 cM	PTEN	10q23.31	phosphatase and tensin homolog	PTEN	B cell anergy			peripheral tolerance	19896393
Pten	19	19 28.14 cM	PTEN	10q23.31	phosphatase and tensin homolog	PTEN	reduced t cell death after activation	Pten+/-	T cell proliferation	lupus	10497129, 9697695
Ptpn22	3 F2.2		PTPN22	1p13.2	protein tyrosine phosphatase non-receptortype 22	Ptpn22	central tolerance	NSG (NOD.Scid.Gamma deficient) huMice	Central tolerance	central tolerance	21804190
Ptpn22	3 F2.2		PTPN22	1p13.2	protein tyrosine phosphatase non-receptortype 22	Ptpn22	peripheral tolerance			peripheral tolerance	21841778, 23619366
Ptpn22	3	3 F2.2	PTPN22	1p13.2	protein tyrosine phosphatase non-receptor type 22	PTPN22	neg regulation of TCR signaling	Pep−/−	expanded effector/memory T cells	lupus	19299707
Ptpn6	6 F2	6 59.17 cM	PTPN6	12p13.31	Shp1	SHP-1	B cell anergy			peripheral tolerance	27114609, 17600736
Ptpn6	6	6 59.17 cM	PTPN6	12p13.31	protein tyrosine phosphatase non-receptor type 6	PTPN6	B cell anergy. IL-1a signalling	Ptpn6 me/me mice, Ptpn6 me-v/me-v, Ptpn6 meb2/meb2	severe autoinflammatory	lupus	1184950, 9586639, 8324828, 8348149,
Ptprc	1	1 60.73 cM	PTPRC	1q31.3-q32.1	protein tyrosine phosphatase receptor type C	PTPRC	inactivated inhibitory activity of CD45	CD45 E613R	lymphocyte activation, autoantibody production	lupus	11163182
Rad51b*	12 C3		RAD51B	14q24.1	RAD51 paralog B	RAD51B	DNA repair			T1D	23589568, 28461573, 23589568
Rasgrp1	2 E5	2 59.19 cM	RASGRP1	15q14	RAS guanyl releasing protein 1	RasGRP1	necessary for autoreactive B1a cell development	Rasgrp1-/-	anti-Phosphatidyl choline natural autoantibody production	peripheral tolerance	26851222
Rasgrp1	2	2 59.19 cM	RASGRP1	15q14	RAS guanyl releasing protein 1	RASGRP1	T cell activation, T cell proliferation	RasGRP1(-/-)	chronic t cell immunodeficiency	lupus	17675473
Rassf5	1	1 56.91 cM	RASSF5	1q32.1	Ras association domain family member 5	RASSF5	S phase entry checkpoint	RAPL−/−	hyperproliferative lymphocytes	lupus	12845325, 15134891, 21194982
Rc3h1	1	1 H2.1	RC3H1	1q25.1	ring finger and CCCH-type domains 1	RC3H1	excessive Tfh and germinal centers	sanroque	excessive IL-21, high auto-antibodies	lupus	15917799
Ro60	1	1 62.54 cM	RO60	1q31.2	Ro60, Y RNA binding protein	TROVE2		Ro60 peptide immunization	anti-Ro and anti-La, anti-dsDNA abs	lupus	19393201, 23607771, 20946951, 10323459, 25370295
Rxra	2	2 19.38 cM	RXRA	9q34.2	retinoid X receptor alpha	RXRA	apoptotic cell clearance	RXRαf/f to use with cre	apoptotic clearance to maintain self-tolerance	lupus	20498053, 21135166
SAP	1 H3	1 80.33	APCS	1q23.2	amyloid P component	APCS	T helper recruitment to germinal centers, germinal center development	SAP-/-	X-linked lymphoproliferative disease	lupus	10426291, 10371509, 10371489
Sh2d2a	3	3 38.78 cM	SH2D2A	1q23.1	SH2 domain containing 2A	SH2D2A	T cell IL-2 secretion and proliferation, defective T cell death	TSAd-/-	Increased number of T and B cells, auto anti-ssDNA and anti-dsDNA abs	lupus	12953096
Skint6**	4 D1					Skint6**	membrane skint6 protein is truncated, has an Ig-like domain and is secreted	Sle2c1rec1d1 sublocus (rec1d1)		lupus	28490805
Slamf1	1	1 79.54 cM	SLAMF1	1q23.3	signaling lymphocytic activation molecule family member 1	SLAMF1	controls T cell and macrophage function	Slamf1(-/-) [B6.129]	only anti-nucleosome auto abs	lupus	21278219
Slamf6	1	1 79.54 cM	SLAMF6	1q23.2-q23.3	SLAM family member 6	SLAMF6	inhibitory receptor, primes Th1 cytokines	Slamf6-/-	auto-antibody formation in slamf6-/- mice	lupus	15589166, 11728339, 16778059
Slc11a1	1 C3	1 38.54cM	Slc11a1	2q35	solute carrier family 11 member 1	Slc11a1	IFNg and NF-kB activation	NOD and Slc11a1 null mice	pro-inflammatory	type 1 diabetes	19111166
Sle1	1 (154-197 Mb)	37 cM					Loss of chromatin tolerance	B6.Sle1 = B6.NZMc1	Lupus		11172029
Sle1a	1 (170 Mb) D1Mit15-D1Mit353	1-cM	PBX1	1q23	PBX Homeobox 1	PBX1	activated nucleosome-reactive CD4+ T cells, reduced CD4+FOXP3+ T regs	B6.Sle1(15-353) =	Lupus	lupus	20445563, 22180614
Sle1b	1 (171-173 Mb) D1Mit113-D1Mit206)	1-cM	slamf6			Slamf1, Slamf2, Slamf5, Slamf6	regulates B cell tolerance in immature B cells	B6.Sle1(113-407) or B6.Sle1(113-206)	Lupus	lupus	15589166
Sle1c1	1 (194-197 Mb). Telomeric end of chr 1 D1Mit274	2-cM	Cr2			Cr2	germinal center B-cell responses	B6.Sle1(274-17) = B6.Sle1c	Lupus	lupus	11728339
Sle1c2	1 (190-193 Mb)		Cr2			Cr2	induces production of autoreactive CD4+ T cells	B6.Sle1(274-17) = B6.Sle1c	Lupus	lupus	16002709
Sle1d	Not defined, probably between Sle1a and Sle1b (between D1Mit206 and D1Mit407)						increased glomerular nephritis but not clear how, possibly early T cell activation	B6.Sle1(113-407) x NZW F1	Lupus
Sle2	Chromosome 4						reduced B cell signaling threshold, elevated B1 formation, B1a expansion, elevated serum polyreactive IgM	B6.Sle2.56R	Lupus		21270826, 9200486
Sle2b	D4MIT144 and D4MIT205		Ifna			Ifna	contributes to B1a expansion but not activation of anti-nuclear autoreactive, contains IFNa gene cluster?	B6.Sle2b.56R	Lupus	lupus	16002692
Sle3	chromosome 7						Elevated CD4:CD8 ratio and T cell:B cell ratio, activated phenotype of T and B cells with age, serum autoantibodies	B6.NZMc7 (Congenic for NZM2410 derived Sle3 interval)	Lupus		10352264
Stat4	1 C1	1 26.67cM	Stat4	2q32.2-q32.3	signal transducer and activator of transcription 4	Stat4	decreased anti-dsDNA Ab, but increased Th2 cytokines	B6.TC.Stat4−/−	autoreactive b cells	lupus	16713741
Tgfb1	7	7 13.98 cM	TGFB1	19q13.2	transforming growth factor beta 1	TGFB1	altered MHC expression	TGF-B1 -/-	elevated anti-dsDNA, ssDNA and sm Abs	lupus	7673733, 8234339
Tlr7	X F5	X 78.31	TLR7	Xp22.2	toll like receptor 7	Tlr7	interferon type 1 response	NOD	type 1 diabetes	T1D	33322152
Tlr7	X F5		TLR7	Xp22.2	Toll-like receptor 7	Tlr7	recognize PAMPs andmediate cytokine production	NOD	type 1 diaetes	T1D	33322152
Tlr7	X F5		TLR7	Xp22.2	Toll like receptor 7	Tlr7	type 1 interferon production, autoantibody increase	B6.yaa	lupus	peripheral tolerance, lupus	16777955
Tlr7	X F5	X 78.31	TLR7	Xp22.2	toll like receptor 7	Tlr7	interferon type 1 response	NOD	type 1 diabetes	T1D	33322152
Tlr7	X	X F5	TLR7	Xp22.2	toll like receptor 7	TLR7	ssRNA binding innate immune receptor	B6.Sle1YaaTLR7(-)	Increased ANA	lupus	18521959, 16709748
Tlr9	9	9 F1	TLR9	3p21.2	toll like receptor 9	TLR9	Activation of auto-reactive clones	TLR9-/-	generation of anti-dsDNA and antichromatin autoabs	lupus	16027240
Tnfrsf11a	1	1 E2.1	TNFRSF11A	18q21.33	TNF receptor superfamily member 11a	TNFRSF11A	B cell tolerance	RANKK240E CD19Cre	premature B cell activation, increased plasma cells and B1a cells. Increased anti-ssDNA and dsDNA	lupus	33075129
Tnfrsf13b	11	11 B2	TNFRSF13B	17p11.2	TNF receptor superfamily member 13B	TNFRSF13B	negative regulator of B cell activity	TACI-/-	elevated autoantibodies	lupus	12594954
Tnfrsf13c	15	15 E1	TNFRSF13C	22q13.2	TNF receptor superfamily member 13C	TNFRSF13C	negative regulator of B cell activity	NZB/W	anti-CL and anti-dsDNA autoantibodies	lupus	26882090, 22102726
Tnfrsf9	4 E2	4 81.52cM	Tnfrsf9	1p36.23	TNF receptor superfamily member 9	Tnfrsf9	control soluble CD137 and CD137+ Treg	NOD.Tnfrsf9−/−, NOD.Idd9.3B10.Tnfrsf9−/−		type 1 diabetes	30867509
Tnfsf13b	8	8 4.55 cM	TNFSF13B	13q33.3	TNF superfamily member 13b	TNFSF13B	regulates apoptosis, NF-kB, and c-Jun	BAFF-/-	excessive mature B cells, GC reactions, autoabs, elevated plasma cells	lupus	10587360, 10359578, 12975458
Tnfsf9	17 D		Tnfsf9	19p13.3	TNF superfamily member 9	Tnfsf9	re-activates anergic T cells	NOD.Tnfsf9−/−	T cell anergy	type 1 diabetes	32295876
Traf3	12 F1	12 60.94 cM	TRAF3	14q32.32	TNF recepto associated factor 3	Traf3	B cell anergy			peripheral tolerance	32591397
Traf3ip2	10	10 B1	TRAF3IP2	6q21	TRAF3 interacting protein 2	TRAF3IP2	GC formation, Ig class switching, memory B cell generation	B6.Act1-/-, Balb/c.Act1-/-	elevated ANA-IgG	lupus	18061473, 18624351, 22585710, 30013031, 23123062
Trim21	7	7 E3	TRIM21	11p15.4	tripartite motif containing 21	TRIM21	moderates interferon regulatory family	Ro52-/-	enhanced pro-inflammatory cytokines, antiDNA auto-abs	lupus	19635858
Tyrobp	7 B1	7 17.45	TYROBP	19q13.12	transmembrane immune signaling adaptor TYROBP	Tyrobp	regulates B cell proliferation	dap12-/-	proliferation in response to anti-IgM	peripheral tolerance, lupus	21727189
Ubash3a	17	17 A3.3-B1	Ubash3a	21q22.3	ubiquitin associated and SH3 domain containing A	Ubash3a	reduced IL2 production, controls TCR signalliing	UBASH3A deficient NOD	hyperreactive t cells	type 1 diabetes	32694640
*Rad51 = Rad51, RAD51B, RAD51C, RAD51D, XRCC2, and XRCC3
https://link.springer.com/article/10.1007%2Fs00281-010-0204-1
**No identified ortholog

## Sheet: ListsForString
Full Network	Lupus	T1D	Central Tolerance	Peripheral Tolerance
Acadl	CD72	CD72	PIK3CA	IRF8
AICDA	FCGR2B	Dusp10	PTPN22	CD72
AIM2	SLAMF6	TLR7	AICDA	PTPN22
Aire	KLK1	Cd101	FOXO1	PTEN
APCS	CORO1A	Dusp10	CXCR4	PTPN6
APCS	CD48	TLR7	MYD88	INPP5D
BAX	CD84	Cd101	GADD45A	CSK
BCL2	Slamf7	CD226	MIR148A	ITGAM
BCL2L11	LY9	RAD51B		LYN
BLK	CRP	Ctla4		BLK
BLK	APCS	Acadl		TLR7
C1Q	DNASE1	Slc11a1		POU2AF1
C1QB	C1QA	Il2		BCL2L11
c1qa	PDCD1	HLA-DQA1		TRAF3
CBLB	LYN	Aire		LGALS9
Cd101	PTPN6	tlr7		IKZF1
Cd101	MNDA	Ubash3a		RASGRP1
CD19	AIM2	Tnfsf9		ETS1
CD22	IFI16	Cd38		TNFSF13
CD226	slamf1	il27		TYROBP
CD24	slamf2	il27ra		NR4A1
CD38	slamf5	Tnfrsf9		NR4A3
Cd38	slamf6	CD70
CD40LG	Cr2	Ncf1
CD48	Cr2
CD48	Ifna
CD70	c1qa
CD72	BAX
CD72	CD24
CD84	LYN
CDKN1A	BLK
cdkn2c	TLR7
CFLAR	POU2AF1
CORO1A	LGALS9
CORO1A	TNFSF13
Cr2	TYROBP
Cr2	MFGE8
CRP	nasp
CSF2	cdkn2c
csf3r	csf3r
CSK	Pbx1
Ctla4	Esrrg
CTLA4	Stat4
CXCR4	Marco
CYBB	APCS
DEF6	BCL2
DNASE1	BLK
Dusp10	CBLB
Dusp10	CD19
E2F2	CD22
EP300	CD40LG
Esrrg	CD48
ETS1	CDKN1A
FCGR2B	CFLAR
FLI1	CORO1A
FOXO1	CSF2
GADD45A	CTLA4
GADD45A	CYBB
GPR132	DEF6
HLA-DQA1	E2F2
ICMT	EP300
IFI16	FLI1
Ifna	GADD45A
IFNA17	GPR132
IFNG	ICMT
IGHM	IFNA17
IKZF1	IFNG
Il2	IGHM
IL2	IL2
il27	IL2RA
il27ra	IL2RB
IL2RA	JUNB
IL2RB	KRAS
INPP5D	LAT
IRF8	LY9
ITGAM	LYN
JUNB	MAN2A1
KLK1	MAP3K1
KRAS	MARCO
LAT	MARK2
LGALS9	MECP2
LY9	MERTK
LY9	MTA2
LYN	NFE2L2
LYN	P2RX7
LYN	PECAM1
MAN2A1	PPARD
MAP3K1	PPARG
Marco	PTEN
MARCO	PTPN22
MARK2	PTPN6
MECP2	PTPRC
MERTK	RASGRP1
MFGE8	RASSF5
MIR148A	RC3H1
MNDA	RXRA
MTA2	SH2D2A
MYD88	SLAMF1
nasp	SLAMF6
Ncf1	BHLHe40
NFE2L2	TGFB1
NR4A1	TLR7
NR4A3	TLR9
P2RX7	TNFRSF13B
Pbx1	TNFRSF13C
PDCD1	TNFSF13B
PECAM1	TRAF3IP2
PIK3CA	TRIM21
POU2AF1	TROVE2
PPARD	TNFRSF11A
PPARG
PTEN
PTEN
PTPN22
PTPN22
PTPN6
PTPN6
PTPN6
PTPRC
RAD51B
RASGRP1
RASGRP1
RASSF5
RC3H1
RXRA
SH2D2A
Slamf1
SLAMF1
Slamf2
Slamf5
Slamf6
SLAMF6
SLAMF6
Slamf7
Slc11a1
Stat4
bhlhe40
TGFB1
TLR7
TLR7
tlr7
TLR7
TLR9
TNFRSF13B
TNFRSF13C
Tnfrsf9
TNFSF13
TNFSF13B
Tnfsf9
TNFRSF11A
TRAF3
TRAF3IP2
TRIM21
TROVE2
TYROBP
Ubash3a
